# Supplementary material
Source: publisher figshare collection journal article supplement (https://karger.figshare.com/ndownloader/files/14863793)
Supplement: Supplementary file 1 [file 14863793]

**Appendix A: Search Strategies**

Medline

1 exp Melanoma/

2 melanoma.mp.

3 Conjunctival Neoplasms/

4 child*.mp.

5 adolescen*.mp.

6 infan*.mp.

7 neonat*.mp.

8 1 or 2

9 4 or 5 or 6 or 7

10 3 and 8 and 9

Embase

1 conjunctiva tumor

2 eye melanoma

3 1 and 2

4 limit 3 to (infant <to one year> or child <unspecified age> or preschool child <1 to 6 years> or school child <7 to 12 years> or adolescent <13 to 17 years>)

Web of Science

TOPIC: (conjunctiva*) AND TOPIC: (melanoma) AND TOPIC: (child* or paediatr* or adolesc*)

Scopus

( TITLE-ABS-KEY ( "melanoma" AND "conjunctiv*" ) AND TITLE-ABS-KEY ( child* OR adolesc* OR pediatr* ) )

**Appendix B: Quality Assessment for Included Studies**

| **Author (alphabetical)** | **History described adequately** | **Exam described adequately** | **Histopathology** | | **Clear timeline of case** | **Management described clearly** | **Follow-Up/Outcome** | |
| --- | --- | --- | --- | --- | --- | --- | --- | --- |
| **Described** | **Slides provided** | **Duration** | **Method** |
| Akor | Y | Y | Y | Y | Y | Y | Y | N |
| Al Masaoudi | Y | N | Y | N | Y | Y | Y | N |
| Aoyagi | Y | Y | Y | Y | Y | Y | N | Y |
| Brownstein (2 cases) | Y | Y | Y | Y | Y | Y | Y | N |
| Burgues-Ceballos | Y | Y | Y | Y | Y | Y | Y | Y |
| Cohen | N | N | N | N | N | Y | Y | N |
| Croxatto | Y | Y | Y | Y | Y | Y | Y | Y |
| Jensen | Y | Y | Y | Y | Y | Y | Y | N |
| Liu | Y | Y | Y | Y | Y | Y | Y | N |
| Mehta | Y | Y | Y | Y | Y | Y | Died | N/A |
| McDonnell (3 cases) | N | N | N | Y | Y | Y | Y | N |
| Ohguro | Y | Y | Y | Y | Y | Y | N | N |
| Polat | Y | Y | Y | Y | Y | Y | Y | N |
| Salcedo-Hernandez | N | N | N | N | N | Y | Y | N |
| Shields (n=13 ≤18yo) | N | Y | N | N | N | Y | N | N |
| Walters | Y | Y | N | Y | Y | Y | N | Y |
| Yangzes | Y | Y | Y | Y | Y | Y | Y | N |
